1 **Best practices of multi-ancestry, meta-analytic transcriptome-wide association studies: lessons**  
2 **from the Global Biobank Meta-analysis Initiative**

3

4 Arjun Bhattacharya\*<sup>1,2</sup>, Jibril B. Hirbo\*<sup>3,4</sup>, Dan Zhou<sup>3,4</sup>, Wei Zhou<sup>5,6,7</sup>, Jie Zheng<sup>8</sup>, Masahiro Kanai<sup>5,6,7,9,10</sup>,  
5 the Global Biobank Meta-analysis Initiative, Mark J. Daly<sup>5,6,7,11</sup>, Bogdan Pasaniuc<sup>1,8,9†</sup>, Eric R.  
6 Gamazon<sup>3,4,14†</sup>, Nancy J. Cox<sup>3,4†</sup>

7

- 8 1. Department of Pathology and Laboratory Medicine, David Geffen School of Medicine, University of  
9 California, Los Angeles, CA, United States
- 10 2. Institute of Quantitative and Computational Biosciences, David Geffen School of Medicine, University  
11 of California, Los Angeles, CA, United States
- 12 3. Department of Medicine, Division of Genetic Medicine, Vanderbilt University School of Medicine,  
13 Nashville, TN, United States
- 14 4. Vanderbilt Genetics Institute, Vanderbilt University Medical Center, Nashville, TN, United States
- 15 5. Analytic and Translational Genetics Unit, Massachusetts General Hospital, Boston, MA
- 16 6. Program in Medical and Population Genetics, Broad Institute of Harvard and MIT, Cambridge, MA
- 17 7. Stanley Center for Psychiatric Research, Broad Institute of Harvard and MIT, Cambridge, MA
- 18 8. MRC Integrative Epidemiology Unit (IEU), Bristol Medical School, University of Bristol, Oakfield  
19 House, Oakfield Grove, Bristol, BS8 2BN, UK
- 20 9. Department of Biomedical Informatics, Harvard Medical School, Boston, MA, USA
- 21 10. Department of Statistical Genetics, Osaka University Graduate School of Medicine, Suita 565-0871,  
22 Japan
- 23 11. Institute for Molecular Medicine Finland, University of Helsinki, Helsinki, Finland
- 24 12. Department of Human Genetics, David Geffen School of Medicine, University of California, Los  
25 Angeles, CA, United States
- 26 13. Department of Computational Medicine, David Geffen School of Medicine, University of California,  
27 Los Angeles, CA, United States
- 28 14. MRC Epidemiology Unit, University of Cambridge, Cambridge, UK

29 \*Corresponding authors: Arjun Bhattacharya ([abtbhatt@ucla.edu](mailto:abtbhatt@ucla.edu)), Jibril Hirbo ([jibril.hirbo@vumc.org](mailto:jibril.hirbo@vumc.org))

30 †These authors contributed equally to this manuscript.

31 **SUMMARY**

32 The Global Biobank Meta-analysis Initiative (GBMI), through its genetic and demographic diversity,  
33 provides a valuable opportunity to study population-wide and ancestry-specific genetic associations.  
34 However, with multiple ascertainment strategies and multi-ethnic study populations across biobanks, the  
35 GBMI provides a distinct set of challenges in implementing statistical genetics methods. Transcriptome-  
36 wide association studies (TWAS) are a popular tool to boost detection power for and provide biological  
37 context to genetic associations by integrating single nucleotide polymorphism to trait (SNP-trait)  
38 associations from genome-wide association studies (GWAS) with SNP-based predictive models of gene  
39 expression. TWAS presents unique challenges beyond GWAS, especially in a multi-biobank and meta-  
40 analytic setting like the GBMI. In this work, we present the GBMI TWAS pipeline, outlining practical  
41 considerations for ancestry and tissue specificity and meta-analytic strategies, as well as open challenges  
42 at every step of the framework. Our work provides a strong foundation for adding tissue-specific gene  
43 expression context to biobank-linked genetic association studies, allowing for ancestry-aware discovery to  
44 accelerate genomic medicine.

45

46 **KEYWORDS**

47 transcriptome-wide association study; meta-analysis; multi-ancestry genetic analysis; Global Biobank  
48 Meta-analysis Initiative

49

50 **INTRODUCTION**

51 Large population-based or clinical-case based biobanks are a key component of precision medicine  
52 efforts and provide opportunities for genetic and genomic research (Abul-Husn and Kenny, 2019).  
53 Biobanks offer context to deploy genome-wide associations (GWAS) at scale. Multi-biobank  
54 collaborations facilitate well-powered, multi-ethnic genetic research (Swede et al., 2007). In addition, such  
55 collaborations can accelerate the elucidation of the biological mechanisms that underlie diseases by in-  
56 silico longitudinal genetic studies and examination of pleiotropy.

57

58 A key challenge in GWAS is interpreting significant trait-associated loci and these loci to genes or  
59 epigenomic features (Gallagher and Chen-Plotkin, 2018; Wijmenga and Zhernakova, 2018). Viable  
60 options to add biological interpretation to our understanding of GWAS loci include colocalization  
61 (Giambartolomei et al., 2014, 2018; Gleason et al., 2020; He et al., 2013) or Mendelian randomization  
62 methods (Hauberg et al., 2017; Pavlides et al., 2016; Smith and Ebrahim, 2003). Another suite of tools  
63 include transcriptome-wide association studies (TWAS), which integrate GWAS with expression  
64 quantitative trait loci (eQTL) analyses to prioritize gene-trait associations (GTAs) with applications of  
65 mediation analysis (Gamazon et al., 2015; Gusev et al., 2016) or Mendelian randomization (Zhang et al.,  
66 2020). TWAS involves three general steps. First, per-gene predictive models of gene expression are  
67 trained in the eQTL dataset using genetic variants. Then, genetically-regulated expression (GR<sub>EX</sub>) is  
68 imputed in the GWAS cohort with individual-level genotypes. Lastly, statistical associations between  
69 GR<sub>EX</sub> and trait are estimated (Barbeira et al., 2018; Gamazon et al., 2015; Gusev et al., 2016). TWAS is  
70 also viable with GWAS summary statistics by estimating the test statistic of the TWAS association using a  
71 proper LD reference panel (Gusev et al., 2016). Generally, most TWAS methods predict expression using  
72 SNPs local to the gene within 1 Megabase of the gene body (Barbeira et al., 2018; Gamazon et al., 2015;  
73 Gusev et al., 2016; Hu et al., 2019; Nagpal et al., 2019; Zhou et al., 2020). Recently, methods that include  
74 strong distal-eQTL signals have shown improved prediction and power to detect GTAs (Bhattacharya et  
75 al., 2021a; Luningham et al., 2020). Nonetheless, practical and statistical considerations to accurately  
76 prioritize GTAs through TWAS still require methodological improvement.

77

78 Along with those from traditional GWAS, TWAS introduces new challenges by incorporating gene  
79 expression (Wainberg et al., 2019) (**Figure 1A**). On the genetic level, as in GWAS, disentangling signals  
80 from complex LD structure, relatedness, and ancestry requires careful modeling considerations  
81 (Mbatchou et al., 2020; Zhou et al., 2018). Selection of LD reference is specifically important in multi-  
82 ancestry settings, like the GBMI, as LD structure across ancestry groups differs greatly (Shifman et al.,  
83 2003). Mismatched LD may lead to gene expression models with reduced predictive power, reduced  
84 power to detect GTAs, and increased false positives (Bhattacharya et al., 2020; Geoffroy et al., 2020;  
85 Keys et al., 2020). In addition, phenotype acquisition and aggregation are challenging, especially across

86 multiple biobanks with different healthcare, electronic health record, and case-control definitions.  
87 However, compared to GWAS, a challenge specific to TWAS is the integration of gene expression with  
88 GWAS signal. Not only is it an active topic of methodological research to choose an optimal set of genes  
89 and tissues that best explains the phenotype association at a given genetic locus, the role of context-  
90 specific expression is still being evaluated in trait associations. Dynamic differences in bulk tissue  
91 expression from cell-type- or cell-state-specificity can give additional granularity to gene-trait associations.  
92 The impact of these challenges in a meta-analytic framework has not been previously explored.  
93  
94 Here, we outline a framework for analyzing trans-ancestry, meta-analytic GWAS across multiple biobanks  
95 with TWAS. We review and explore practical considerations for all three steps (**Figure 1B**): ancestry  
96 specificity of expression models and LD reference panels, meta-analytic techniques for detection of  
97 GTAs, and follow-up tests and analyses for biological context. Our framework can be applied to various  
98 phenotypes to study population-wide and ancestry-specific genetic associations mediated by tissue-  
99 specific expression.

100

## 101 **RESULTS**

### 102 ***Expression models are not portable across ancestry groups***

103 The diversity represented in the GBMI enables uniquely well-powered studies to detect genetic  
104 associations in non-European populations. However, optimal TWAS requires ancestry-matched training  
105 datasets of genetic and tissue-specific gene expression data, which are still lacking in non-European  
106 samples. As Cao *et al* points out (Cao et al., 2021), statistical power to detect GTAs in TWAS is  
107 dependent on expression heritability and the ability of the predictive expression model to recapitulate that  
108 heritable expression in the external GWAS panel. Accordingly, training expression models that perform  
109 well in all ancestry populations is necessary to ensure that discoveries made through TWAS are not  
110 restricted to European populations. For the first GBMI TWAS, we restrict analysis to populations of  
111 European ancestry, due to small sample sizes of non-European ancestry samples (Aguet et al., 2020).  
112 However, as sample sizes for eQTL datasets in non-European populations increase, the TWAS pipeline

113 will include expression models for these understudied and underserved populations (**STAR Methods**).

114 Here, we illustrate some challenges in building these expression models across ancestry groups.

115

116 We considered the 5 tissues in GTEx with at least 70 samples from both European (EUR) and African

117 (AFR) ancestry: subcutaneous adipose (abbreviated ADIP,  $N = 71$  samples of AFR ancestry and 492

118 samples of EUR ancestry), tibial artery (ARTERY,  $N = 76$  and 489), skeletal muscle (MUSC,  $N = 86$  and

119 602), sun exposed lower leg skin (SKIN,  $N = 73$  and 518), and whole blood (BLOOD,  $N = 80$  and 574).

120 For genes with significantly heritable expression in both EUR and AFR GTEx samples (restricted

121 maximum likelihood-based estimate of heritability  $> 0$  with nominal  $P < 0.01$ ), we trained EUR- and AFR-

122 specific models using elastic net regularized regression (Friedman et al., 2010) and imputed expression

123 into the aligned (i.e., training and imputation samples have similar ancestries) and misaligned (i.e.,

124 training and imputation sample have different ancestries). For context, we also built ancestry-unaware

125 models, where EUR and AFR samples were pooled together. We calculated predictive performance with

126 adjusted  $R^2$  to account for sample size, using leave-one-out CV when measuring predicting performance

127 in an aligned imputation sample (**STAR Methods**).

128

129 Across these tissues, models trained in EUR samples performed, on average, 4 times worse (differences

130 of 0.03-0.04 in median adjusted  $R^2$ ) in AFR samples compared to models trained in AFR samples (**Figure**

131 **2A, Tables S1-S3**), with more than 80% of gene models with stronger performance if trained in AFR

132 samples. Similar trends hold for ancestry-specific models imputed into down-sampled EUR imputation

133 samples (**Figure S1-S2, Table S1-S3**), consistent with previous simulation and real-world studies

134 (Bhattacharya et al., 2020; Keys et al., 2020); here, we considered a randomly selected EUR imputation

135 sample with equal sample size to that of the AFR sample in the same tissue. In fact, we observed that

136 ancestry-specific models imputed into a sample with aligned ancestry showed larger predictive  $R^2$  than

137 ancestry-unaware (individuals of EUR and AFR ancestry in the training sample) models imputed into the

138 same sample (**Figure 2B, Table S4**), despite generally increased sample sizes. This observation also

139 holds if we further increase the sample size of the training sample by including individuals of other

140 ancestries (Asian, American Indian, and Unknown ancestries) into the training sample (**Figure S3**). This

141 observation emphasizes the need for ancestry matching in gene prediction from genetic data and greater  
142 recruitment of non-European ancestry patients in eQTL studies.

143

144 In these analyses, one reason ancestry-unaware models may perform poorly in AFR samples is due to  
145 differences in minor allele frequency (MAF) of highly predictive SNPs between EUR and AFR ancestry  
146 populations. It is important to note that this discrepancy is not generally specific to any one ancestry;  
147 rather, ancestry imbalance in the training or reference datasets may lead to poor portability of genetic  
148 models due to differences in allele frequency. To account for common SNPs in both AFR or EUR  
149 ancestry populations, we additionally trained ancestry-unaware and ancestry-specific models using SNPs  
150 with minor allele frequency (MAF) exceeding various thresholds in both AFR and EUR samples.  
151 Excluding SNPs with  $MAF < 0.01$  improved predictive performance of ancestry-unaware models across  
152 all tissues (**Figure S4, Table S5**). However, the gap in predictive performance between ancestry-specific  
153 and ancestry-unaware models did not decrease when the MAF cutoff was increased (**Figure 2B, Table**  
154 **S4**). This observation may reflect that dropping ancestry-specific rarer SNPs ignores variants with large  
155 ancestry-specific effects on gene expression. Additionally, excluding rare ancestry-specific SNPs does  
156 not address the differences in LD across the EUR and AFR samples which leads to different  
157 regularization paths and, hence, SNP-gene weights. Addressing the trans-ancestry portability of  
158 expression models remains an open study direction; methodology that borrows information from  
159 functional annotations or across different cell-type- or cell-state-specific contexts may bridge this gap in  
160 predictive performance, similar to recent developments in polygenic risk score prediction for complex  
161 traits (Amariuta et al., 2020; Márquez-Luna et al., 2020).

162

### 163 ***Meta-analytic strategies must be ancestry-aware***

164 Another critical consideration for the GBMI involves meta-analysis while using GWAS summary statistics.  
165 TWAS estimates the association between GReX and the phenotype by weighting the standardized SNP-  
166 trait effect sizes from GWAS summary statistics by SNP-gene weights from the expression models. To  
167 account for the correlation between SNPs, an external LD reference panel, like the 1000Genomes Project  
168 (Auton et al., 2015), is used to estimate the standard error of the TWAS association. Accordingly, the

169 accuracy of this reference panel to the LD structure in the GWAS cohort dictates how aligned the  
170 summary-statistics based TWAS association is to the TWAS association from direct imputation into  
171 individual-level genotypes in the GWAS cohort. Ideally, in-sample LD will give the best estimate of the  
172 TWAS standard error, but several biobanks do not provide this information under their specific genetic  
173 data sharing and privacy policies. Even departures in LD across subgroups of European ancestry  
174 populations may influence the standard error estimate. In addition, as the estimates of SNP-gene weights  
175 are influenced by the LD in the eQTL panel, differences in LD between the eQTL and GWAS panel will  
176 also affect the TWAS effect size.

177

178 As LD structure greatly differs across ancestry groups (Shifman et al., 2003), pooling ancestry groups in  
179 TWAS may lead to reduced power. We conducted TWAS for asthma risk using ancestry-unaware and  
180 EUR- and AFR-specific models of whole blood expression (4,782 genes with heritable expression at  
181 nominal  $P < 0.01$  and models with cross-validation  $R^2 > 0.01$  with nominal  $P < 0.05$ , trained via elastic net  
182 regression). Ancestry-specific TWAS Z-scores across EUR and AFR ancestry groups were not strongly  
183 correlated ( $r = 0.11$ ), potentially due to differences in sample size and eQTL and GWAS architecture  
184 (**Figure 3A, Figure S5-S6**) (Shang et al., 2020; Wyss et al., 2018). In fact, we detected only two genes  
185 across both EUR and AFR with  $P < 2.5 \times 10^{-6}$ . One of these genes, *DFFA*, has been implicated with  
186 asthma risk through GWAS and colocalization in EUR (Vicente et al., 2017). However, the TWAS  
187 associations across EUR and AFR were in opposite directions using blood tissue. In the other 4 tissues  
188 explored, *DFFA* TWAS associations did not reach transcriptome-wide significance but effect directions  
189 were generally concordant (**Figure S7**). In blood, lead local-eQTLs (within 1 Megabase) of *DFFA* show  
190 are in opposite directions, though only nominally significant at  $P < 0.05$  (**Figure S8**). Although they are  
191 within 60 kilobases, the lead eQTLs for *DFFA* across AFR (rs263526) and EUR (rs903916) are not in LD  
192 ( $R^2 = 3 \times 10^{-4}$  in AFR, 0.0072 in EUR). The GWAS effect sizes of SNPs local to *DFFA* do not show large  
193 deviations in effect direction and are only nominally significant, as well (**Figure S8**). These differences in  
194 TWAS associations across ancestry motivate careful consideration of meta-analytic strategy to avoid  
195 biasing cross-ancestry associations towards cohorts with larger sample sizes, which still tend to be  
196 predominantly of EUR ancestry.

197  
198 We investigated 5 different meta-analytic strategies empirically: meta-analyzing across ancestry-specific,  
199 per-biobank GWAS summary statistics using (1) inverse-variance weighting (IVW) and (2) sample-size  
200 weighting (SSW), meta-analyzing across ancestry-specific meta-analyzed GWAS summary statistics  
201 using (3) IVW and (4) SSW, and (5) TWAS using ancestry-unaware models and meta-analyzed GWAS  
202 summary statistics across EUR and AFR ancestry groups (**STAR Methods**). QQ-plots in **Figure 3B** show  
203 earlier departure of Z-scores from the QQ-line for SSW meta-analyzed Z-scores and the ancestry-  
204 unaware strategy, suggesting inflation. This observation is supported with estimates of test statistic bias  
205 and inflation using an empirical Bayes method, *bacon* (van Iterson et al., 2017), which show the largest  
206 estimated bias and inflation for these SSW and ancestry-unaware methods. IVW strategies show similar  
207 levels of inflation, with IVW meta-analysis across ancestry-specific meta-analyzed GWAS summary  
208 statistics showing minimal bias (**Figure S9**). These results align with intuition – that the more naïve SSW  
209 meta-analysis and ancestry-unaware methods bias towards EUR cohorts, which have the larger sample  
210 sizes, whereas Z-scores from the IVW methods showed positive correlations with Z-scores from AFR  
211 cohorts (**Figure S6**).

212  
213 However, it is unclear whether ancestry-specific IVW meta-analysis to the per-biobank level is necessary.  
214 As shown in **Figure S10**, Z-scores from these two IVW methods are moderately positively correlated ( $r =$   
215  $0.51$  across 4,152 Z-scores), with this correlation increasing when we consider genes with nominally  
216 significant Z-scores for both strategies ( $r = 0.70$  across 564 tests). We observed that top associations  
217 across these IVW meta-analyses often had high degrees of heterogeneity in effect size across biobanks,  
218 as measured by the Higgins-Thompson  $I^2$  statistic (**Figure 3C, Figure S11**) (Higgins and Thompson,  
219 2002). One gene, *A1BG*, that showed directionally concordant transcriptome-wide significant associations  
220 across both IVW strategies had a large degree of heterogeneity in the underlying participating cohorts ( $I^2$   
221  $= 0.77$ ). In fact, the cross-biobank heterogeneity is often larger than the cross-ancestry heterogeneity for  
222 TWAS associations of *A1BG*. Interestingly, *ZNF665*, another gene with directionally concordant  
223 associations across both IVW strategies showed a low degree of heterogeneity in the per-biobank effect  
224 sizes ( $I^2 = 0.26$ ). However, genes with discordant associations across IVW strategies showed varied



225 patterns. Two illustrative examples are *MLNR* and *MYOZ3*, both with large degrees of test statistic  
226 heterogeneity ( $I^2 = 0.91$  and  $0.82$ , respectively). Across the two IVW strategies, effect sizes are in  
227 opposite directions, possibly due to large standard error differences across the ancestry-specific per-  
228 biobank associations. A thorough investigation of the power and false discovery rates of these meta-  
229 analysis strategies through simulations is necessary. More sophisticated methods (Hedges and Vevea,  
230 1998; Lee et al., 2017; Shi and Lee, 2016) that can properly incorporate the per-biobank uncertainty into  
231 meta-analyzed TWAS associations must be explored to increase power and properly leverage the large  
232 sample sizes of the GBMI.

233

234 In addition to considerations for TWAS in trans-ethnic populations, analyzing genetic data from individuals  
235 of admixed ancestry is also an open area of study. For example, in this analysis, we have used the  
236 1000Genomes AFR LD reference panel as an estimate of the LD for the AFR-ancestry samples from  
237 each biobank. However, most of these AFR-ancestry populations are of admixed ancestry (e.g, African  
238 Americans or African British). A single LD reference panel of AFR-ancestry may not reflect the genetic  
239 diversity in these admixed populations of AFR and EUR ancestries from around the world (Baharian et  
240 al., 2016). As Zhong et al highlights, in multiethnic and admixed populations, using local ancestry  
241 estimates aids in better characterization of heritability of complex traits and more accurate mapping of  
242 genetic associations, especially eQTLs (Zhong et al., 2019). Accordingly, incorporating local ancestry  
243 estimates into both expression model step and the association testing step of TWAS may lead to  
244 increased power and should be explored.

245

#### 246 ***Follow-up tests provide biological and clinical context to TWAS GTAs***

247 TWAS GTAs identified using GWAS summary statistics are subject to several factors that may lead to  
248 false positives. We implement several follow-up tests to provide context to TWAS-identified GTAs. First, a  
249 TWAS GTA could attain transcriptome-wide significance due to only the strong SNP-trait associations  
250 from the underlying GWAS. To quantify the significance of the GTA conditional on the SNP-trait effects at  
251 the locus, we perform a permutation test by permuting the SNP-gene weights from the expression model  
252 to generate a null distribution (**STAR Methods**). Comparing the original TWAS Z-score to this null

253 distribution assesses how much signal is added by the expression given the specific GWAS architecture  
254 of the locus. As Gusev *et al* point out, this permutation test is highly conservative and intended to  
255 prioritize only associations already significant in the standard TWAS GTA detection (Gusev et al., 2016).

256

257 Next, gene expression models for genes in adjacent genomic windows may be built from overlapping  
258 SNPs or SNPs in strong LD. When TWAS detects GTAs in overlapping genomic regions, we apply  
259 Bayesian probabilistic fine-mapping using FOCUS (Mancuso et al., 2019) to estimate a 90% credible set  
260 of genes to explain the observed association signal in a given tissue (**STAR Methods**). However, the  
261 current iteration of FOCUS has limitations. Priors for the correlation matrix between GReX of overlapping  
262 genes are dependent on SNP LD reference panels. Thus, fine-mapping in trans-ancestry settings is  
263 difficult, though recent machinery has been added to FOCUS to account for differences in genetic  
264 architecture across the study sample (Gopalan and Lu et al, in preparation). Another challenge for gene-  
265 level fine-mapping in multi-tissue TWAS is distinguishing between overlapping signals across tissues.  
266 Primarily due to cross-cell-type variation in expression levels and eQTL architecture, TWAS may prioritize  
267 genes in multiple tissues that are overrepresented by the same underlying causal cell-types (Wainberg et  
268 al., 2019). This multi-tissue gene prioritization extends to fine-mapping overlapping TWAS signals across  
269 tissue, as priors for FOCUS are not tissue-dependent. An interesting future direction involves careful  
270 tissue-specific prior elicitation in TWAS fine-mapping – extracting posterior signal that is biologically  
271 consistent and meaningful without allowing the prior to dominate.

272

273 The GBMI TWAS model incorporates gene expression models using MOSTWAS, a TWAS extension that  
274 prioritizes distal-eQTLs by testing their mediation effect through local molecular features (**STAR**  
275 **Methods**). For genes with models trained with MOSTWAS and associated with the trait at transcriptome-  
276 wide significance, we test the additional association signal from the distal-SNPs using an added-last test,  
277 analogous to a group-added-last test in linear regression (Bhattacharya et al., 2021a). This test also  
278 prioritizes sets of genomic or epigenomic features that mediate the predicted distal-eQTLs for subsequent  
279 study of upstream, tissue-specific regulation of GTAs. In one application of MOSTWAS, one prioritized  
280 functional hypothesis was experimentally validated *in vitro* (Bhattacharya et al., 2021b). As distal-eQTLs

281 are more likely to be tissue- or cell-type-specific (Yang et al., 2017), the association signal from these  
282 distal-eQTLs could also be leveraged in cross-tissue fine-mapping strategies.

283

284 Lastly, TWAS suffers from severely reduced power and inflated false positives in the presence of SNP  
285 pleiotropy, where the genetic variants in the gene expression model affect the trait, independent of gene  
286 expression (Veturi and Ritchie, 2018). We encourage estimating the degree of and accounting for SNP  
287 pleiotropy using LDA-MR-Egger (Barfield et al., 2018) or PMR-Egger (Yuan et al., 2020), especially in  
288 settings with individual-level GWAS genotypes. Applications for these methods using GWAS summary  
289 statistics reveals some inflation of standard errors (Zhu et al., 2021), suggesting the need for further  
290 evaluation and development of summary statistics-based methods to account for SNP pleiotropy in  
291 TWAS GTA detection.

292

### 293 ***Biobanks enable GReX-PheWAS for biological context***

294 Biobanks aggregated in the GBMI provide a rich catalog of phenotypes for analysis, with phenotype  
295 codes (phecodes) aggregated from ICD codes classified into clinically relevant categories (Wei et al.,  
296 2017). This phenotype catalog enables Phenome-Wide Association Studies (PheWAS) as a complement  
297 to GWAS by both replicating GWAS associations and providing a larger set of traits associations with  
298 GWAS variants. To follow-up on novel TWAS-prioritized genes, we may expand the PheWAS framework  
299 to the tissue-specific GReX level in a similarly complementary analysis: GReX-level Phenome-Wide  
300 Association Study (GReX-PheWAS), as previously deployed in biobank settings and similar to the  
301 PredixVU database (Pathak et al., 2020; Unlu et al., 2019, 2020). Not only do these analyses replicate  
302 and detect new TWAS associations, but they can also point to groups of phenotypes that show  
303 enrichments for trait-associations for the gene of interest.

304

305 We briefly illustrate an example of GReX-PheWAS using 3 genes (**Figure 4, Figure S12-S13, Table S6**):  
306 *TAF7*, a novel gene in our TWAS, and *ILRAP18* and *TMEM258*, two genes previously implicated through  
307 GWAS (Johansson et al., 2019; Portelli et al., 2020; Reijmerink et al., 2008, 2010; Zhu et al., 2020).

308 These genes were prioritized from European-specific TWAS for asthma risk from Zhou *et al* (Zhou et al.,

2021) using lung tissue expression (101,311 cases and 1,118,682 controls): *TAF7* (MOSTWAS model),  
*IL18RAP* (JTI model), and *TMEM258* (JTI model). European-specific TWAS meta-analysis for asthma  
detected a negative association with *TAF7* cis-GReX, a gene that did not intersect a GWAS-significant  
locus. In TWAS follow-up tests, *TAF7* passed permutation testing and was estimated in the 90% credible  
set at the genomic locus via FOCUS with posterior inclusion probability 1. *TAF7* encodes a component of  
the TFIID protein complex, which binds to the TATA box in class II promoters and recruits RNA  
polymerase II and other factors (Bhattacharya et al., 2014). As the clinically-relevant associations for  
*TAF7* lung GReX are not characterized, we employed GReX-PheWAS in UKBB European-ancestry  
GWAS summary statistics across 731 traits and diseases with sample sizes greater than 100,000,  
grouped into 9 categories (**Figure 4, STAR Methods**). We see enrichments for phenotypes of the  
hematopoietic and musculoskeletal groups (**Figure 4A**) with hypothyroidism and chronic laryngitis as the  
top phenotype associations (**Figure 4B, Table S6**). These phenotypes include multiple inflammations of  
organs (e.g., laryngitis, osteitis, meningitis, inflammations of the digestive and respiratory system, etc).  
We also detected several associations with related respiratory diseases and traits. Similarly, for the two  
previously implicated genes, we find enrichments for respiratory and hematopoietic GTAs for *ILRAP18*  
and across multiple categories for *TMEM258*, consistent with the categorized functions and associations  
of these genes (**Figure S12-S13, Table S6**). The utility of GBMI's robust roster of phenotypes enables  
GReX-PheWAS to add biological and clinical context to novel TWAS associations.

GReX-PheWAS, despite its utility, shares the challenges of PheWAS. Phenotypes within and across  
groups may be correlated, leading to a series of dependent tests. Even divergent phenotypes may be  
correlated, either clinically or biologically. Thus, simple adjustments of multiple testing burden may not be  
appropriate, and methods that account for correlation between phenotypes, like permutation tests, may  
be more applicable (Hebbring, 2014; Korthauer et al., 2019; Stevens et al., 2017; Wei et al., 2017). In  
addition, covariate adjustments in expression models built for disease-specific analyses may not be  
generalizable for multiple phenotypes. Most population-based clinical biobanks lack comprehensive  
clinical and lifestyle information of the individuals. Phenotyping information is typically incomplete, mostly  
due to gaps in electronic health records. Phenotype groupings may also be deceptive: as most biobanks

337 follow ICD coding that groups traits and diseases by body systems, GReX-PheWAS enrichments for a  
338 given group may not reflect shared genetic pathways across body systems. In addition, case-control  
339 selection may not be optimal due to differences in exclusion criteria (McGuirl et al., 2020). Lastly,  
340 phenotype acquisition and aggregation across multiple biobanks is challenging, with different healthcare,  
341 electronic health record, and case-control definition assignments. Despite these limitations in phenotype  
342 acquisition, recent methods focusing on identifying shared genetic architecture among multiple  
343 phenotypes (McGuirl et al., 2020) in a phenome-wide approach highlight the advantages of GReX-  
344 PheWAS.

345

## 346 **DISCUSSION**

347 Here, we provide a framework for TWAS in a multi-biobank setting across many ancestry groups. Our  
348 work outlines several methodological gaps that should be addressed in the future: (1) training expression  
349 models that are portable across ancestry groups, (2) limiting false discovery in TWAS by properly  
350 modeling differences in LD across ancestry groups, (3) incorporating uncertainty within and heterogeneity  
351 across biobanks to boost TWAS meta-analytic power, and (4) contextualizing TWAS GTAs through  
352 follow-up testing, probabilistic fine-mapping across ancestry groups and expression contexts, and GReX-  
353 PheWAS. Along with the discussed issues with current TWAS methodology, tissue-specific expression  
354 may not provide sufficient granularity needed to discover trait-relevant biological mechanisms. Recent  
355 methods that study the mediation of the SNP-trait relationship by cell-type heterogeneity show that cell-  
356 types are influenced by genetics and predict complex traits (Liu et al., 2021). In turn, single-cell eQTL  
357 datasets can be integrated with GWAS to identify cell-type- or cell-state-specific expression pathways that  
358 are health- or disease-related. Incorporating single cell expression data into a predictive model will  
359 require more sophisticated statistical methodology that relies on modeling cell identity as a spectrum,  
360 rather than a categorical definition (Burkhardt et al., 2021; Verma and Engelhardt, 2020). Furthermore, a  
361 multi-omic approach that incorporates functional data with TWAS may better model the flow of biological  
362 information in a biologically interpretable fashion (Baca et al., 2021; Bhattacharya et al., 2021a), with  
363 Zhao et al, in preparation.

364

365 Despite the limitations of this suite of methods, TWAS continues to be a useful tool for interpreting GWAS  
366 associations and independently discovering genetic associations mediated by gene expression. There is  
367 a severe need for an increase in reference eQTL data from individuals of non-European ancestry at parity  
368 with those of European-ancestry individuals. Moreover, more sophisticated integrative computational and  
369 experimental tools to complement improved TWAS and GWAS to understand the biology underlying  
370 health and disease need to be developed.

371

## 372 **FUNDING**

373 BP was partially supported by NIH awards R01 HG009120, R01 MH115676, R01 CA251555, R01  
374 AI153827, R01 HG006399, R01 CA244670, U01 HG011715. ERG is supported by the National Institutes  
375 of Health (NIH) grants: NHGRI R35HG010718, NHGRI R01HG011138, NIA AG068026, and NIGMS  
376 R01GM140287. NJC is supported by U01HG009086.

377

## 378 **DATA AND CODE AVAILABILITY**

379 The all-biobank and ancestry-specific GWAS summary statistics are publicly available for downloading at  
380 <https://www.globalbiobankmeta.org/resources> and browsed at the PheWeb Browser  
381 <http://results.globalbiobankmeta.org/>. 1000 Genome Phase 3 data can be accessed at  
382 [ftp://ftp.1000genomes.ebi.ac.uk/vol1/ftp/data\\_collections/1000\\_genomes\\_project/data](ftp://ftp.1000genomes.ebi.ac.uk/vol1/ftp/data_collections/1000_genomes_project/data). MOSTWAS can  
383 be accessed from <https://github.com/bhattacharya-a-bt/MOSTWAS>, and JTI can be accessed from  
384 <https://github.com/gamazonlab/MR-JTI>. Sample scripts for this manuscript are available at  
385 [https://github.com/bhattacharya-a-bt/gbmi\\_twas](https://github.com/bhattacharya-a-bt/gbmi_twas).

386

## 387 **ACKNOWLEDGEMENTS**

388 We thank Nicholas Mancuso, Michael Love, and Achal Patel for their thoughtful discussion during the  
389 research process. We would like to thank the organizing committee of the International Common Disease  
390 Alliance for intellectual contributions on the set up of the GBMI as a nascent activity to the larger  
391 effort. We would like to thank Daniel King from the Hail team and Sam Bryant from the Stanley Center  
392 Data Management team at the Broad Institute for helping with the Google bucket set up and data

393 sharing, and Bethany Klunder from the University of Michigan Medical school for helping with the  
394 paper submission.

395

#### 396 **AUTHOR CONTRIBUTIONS**

397 Conceptualization: AB, JH; Methodology: AB, JH, DZ, ERG, BP, NJC; Software: AB, JH, DZ, ERG, BP,  
398 NJC; Validation: AB, JH, DZ; Formal analysis: AB, JH; Investigation: all authors; Resources: all authors;  
399 Data curation: WZ, MK; Writing - original draft: AB, JH; Writing - Review & Editing: all authors;  
400 Visualization: AB, JH; Supervision: EG, BP, NJC; Project administration: AB, JH, ERG, BP, NJC; Funding  
401 acquisition: all authors

402

#### 403 **DECLARATION OF INTERESTS**

404 MJD is a founder of Maze Therapeutics. ERG receives an honorarium from the American Heart  
405 Association, as a member of the Editorial Board of *Circulation Research*.

406

#### 407 **FIGURE LEGENDS**

408 **Figure 1:** *Overview of GBMI transcriptome-wide association study (TWAS) pipeline with challenges at*  
409 *every data level. (A)* Each level of data in TWAS introduces a unique set of challenges: (1) genetics data  
410 include confounding from genetic ancestry, population structure and relatedness, and complex linkage  
411 disequilibrium patterns, (2) gene expression data introduces context-specific factors, such as tissue-, cell-  
412 type-, or cell-state-specific expression, and (3) phenotypic data, especially in the meta-analyses of  
413 multiple biobanks, involve challenges in acquiring and aggregating phenotypes, properly defining controls  
414 for phenotypes, and ascertainment and selection bias from non-random sampling. **(B)** An overview of the  
415 GBMI TWAS pipeline: (1) JTI and MOSTWAS for model training, (2) inverse-variance weighted meta-  
416 analysis using per-biobank, per-ancestry group TWAS summary statistics, and (3) various follow-up tests,  
417 including conditional or permutation tests, distal-SNPs added last test, probabilistic fine-mapping using  
418 FOCUS, and tests for SNP horizontal pleiotropy. Dotted lines represent associations that are tested in the  
419 TWAS pipeline, while the solid lines represent a link built through predictive modeling.

420

421 **Figure 2: Comparison of predictive performance of genetic models of expression across ancestry. (A)**  
422 Distribution of difference in adjusted  $R^2$  (Y-axis) when predicting expression in the AFR imputation sample  
423 between models trained in EUR and in AFR training samples across tissue (X-axis). **(B)** Distribution of  
424 difference in adjusted  $R^2$  between ancestry-specific and ancestry-unaware models imputing into EUR  
425 (left) and AFR (right) samples.

426

427 **Figure 3: Comparison of meta-analytic strategies for multi-biobank, trans-ancestry TWAS. (A)** Scatterplot  
428 of per-ancestry meta-analyzed TWAS scores across EUR (X-axis) and AFR ancestry (Y-axis). The dotted  
429 horizontal and vertical lines indicate  $P < 2.5 \times 10^{-6}$  with a diagonal line for reference. Points are colored  
430 based on which ancestry population the TWAS association meets  $P < 2.5 \times 10^{-6}$ . **(B)** QQ-plot of TWAS  
431 Z-scores, colored by meta-analytic strategies. Per ancestry refers to TWAS meta-analysis across meta-  
432 analyzed ancestry-specific GWAS summary statistics. Per bank/per ancestry refers to TWAS meta-  
433 analysis using all biobank- and ancestry-specific GWAS summary statistics. **(C)** Effect sizes and  
434 Bonferroni-corrected confidence intervals (CIs) for TWAS associations across 17 individual biobanks  
435 (stratified by ancestry group with EUR in green and AFR in red) and 2 IVW meta-analysis strategies (in  
436 yellow) for 5 representative genes. The Higgins-Thompson  $I^2$  statistic for heterogeneity is provided, with  
437 the dotted line showing the null.

438

439 **Figure 4: GReX-PheWAS for categorizing phenome-wide associations for TAF7 genetically-regulated**  
440 *expression in UKBB. (A)* Boxplots of  $-\log_{10}$  Benjamini-Hochberg FDR-adjusted P-values of GTAs across 9  
441 phenotype groups. The dotted grey line showed FDR-adjusted  $P = 0.05$ . **(B)** Miami plot of TWAS Z-  
442 scores (Y-axis) across phenotypes, colored by phecode group. The dotted grey line shows the  
443 significance threshold for Benjamini-Hochberg FDR correction and phenotypes are labelled if the  
444 association passes Bonferroni correction.

445

## 446 **STAR METHODS**

447 We first outline the steps of the TWAS pipeline employed for phenotype available for analysis in the  
448 GBMI. Then, we provide details for the analyses presented in **Results**.



449

## 450 ***The GBMI TWAS Pipeline***

### 451 *Training expression models from genetics*

452 Tissue-specific expression models trained with reference data from the Genotype-Tissue Expression  
453 Project (GTEx) v8 (Aguet et al., 2020) are built using two methods: (1) Joint-Tissue Imputation (JTI),  
454 which leverages shared genetic *cis*-regulation across tissues (Zhou et al., 2020), and (2) MOSTWAS,  
455 which prioritizes tissue-specific distal-SNPs through rigorous mediation analysis to account for additional  
456 expression heritability (Bhattacharya et al., 2021a). Genes with significantly positive expression  
457 heritability (nominal  $P < 0.05$ ) and five-fold cross-validation (CV) adjusted  $R^2 \geq 0.01$  with  $P < 0.05$  are  
458 considered for TWAS. Ancestry-specific models are trained, excluding SNPs with MAF  $< 0.01$  and  
459 deviated from Hardy-Weinberg at  $P < 10^{-5}$  across all 838 GTEx samples. The first iteration of the GBMI  
460 TWAS pipeline focuses on EUR-ancestry models due to larger sample sizes. However, as sample sizes  
461 for other ancestry groups increase, this pipeline can be adapted for these currently underrepresented  
462 ancestries. In addition, models from other data sources using other methods can be incorporated in  
463 subsequent steps.

464

### 465 *Hypothesis tests for TWAS*

466 To test for an association between tissue-specific GReX of a gene and a trait of interest, GWAS summary  
467 statistics are integrated with these expression models. For the EUR-specific TWAS, we use EUR-specific  
468 meta-analyzed GWAS summary statistics across all biobanks. JTI and MOSTWAS use two different  
469 approaches to test for a GTA. For MR-JTI, the posterior predictive distribution of GReX is estimated, and  
470 multiple-instrumental-variable causal inference is used to estimate the GTA, controlling for overall  
471 heterogeneity (Zhou et al., 2020). For MOSTWAS, a weighted burden test is constructed, as in FUSION  
472 (Bhattacharya et al., 2021a; Gusev et al., 2016; Pasaniuc et al., 2014). Both of these methods require a  
473 LD reference panel; the GTEx LD matrix is used as a reference. Taken together, these methods provide  
474 effect sizes, standard errors, Z-scores (effect sizes standardized by standard error), and P-values for  
475 GTAs. A GTA is transcriptome-wide significant using a Bonferroni correction across all tests run. The  
476 number of tests run is equal to the sum of the number of significant gene models across all tissues.

477  
478 Follow-up tests and analyses are then run to provide context to the TWAS GTAs. A permutation test is  
479 run by shuffling the SNP-gene weights 1,000 times and determining the TWAS Z-score at each  
480 permutation, generating a null distribution. The original TWAS Z-score is compared to this null distribution  
481 to generate a permutation P-value; Benjamini-Hochberg FDR correction is used to account for multiple  
482 testing burden here. This test examines whether the SNP-gene relationship provides more information  
483 than just the SNP-trait association. Next, for MOSTWAS, the distal-SNPs added-last test is run to  
484 measure the association from distal-SNPs in the expression models, conditional on the association from  
485 local-SNPs (Bhattacharya et al., 2021a). This test prioritizes sets of mediating molecular features for the  
486 SNP-gene relationship with significant effects on the trait. Lastly, for genes whose models are built using  
487 SNPs from overlapping genomic regions, probabilistic fine-mapping via FOCUS (default parameters and  
488 priors) is employed to determine a 90% credible set of genes that explain the gene-level association  
489 signal at the locus (Mancuso et al., 2019). FOCUS also outputs posterior inclusion probabilities for each  
490 gene in the 90% credible set.

491  
492 ***Analysis of ancestry-specific and -unaware models***  
493 To show the utility of ancestry-specific models, we train EUR- and AFR-specific models using elastic net  
494 regression for 5 tissues with more than 70 samples from AFR ancestry patients: subcutaneous adipose  
495 ( $N = 492$  EUR,  $N = 71$  AFR), tibial artery ( $N = 489$  EUR,  $N = 76$  AFR), skeletal muscle ( $N = 602$  EUR,  
496  $N = 86$  AFR), sun exposed lower leg skin ( $N = 518$  EUR,  $N = 73$  AFR), and whole blood ( $N = 574$  EUR,  
497  $N = 80$  AFR). To balance sample sizes in the imputation sample, we down-sampled the EUR ancestry  
498 imputation sample to match the AFR imputation sample. We consider only genes with positive expression  
499 heritability in both EUR and AFR training samples (Yang et al., 2011). We also build ancestry-unaware  
500 models, where genotypes for EUR and AFR samples are pooled together in the training sample. We  
501 calculate predictive performance in aligned and misaligned imputation samples based on ancestry; the  
502 aligned imputation sample is one with ancestry that predominantly matches the ancestry of the training  
503 sample. Predictive performance is measured with adjusted  $R^2$  to account for sample size, using an  
504 appropriate linear model between predicted and observed expression. For imputation samples that are

505 used in training (aligned imputation panel), we use leave-one-out CV when measuring predictive  
506 performance. Lastly, when imputing into AFR and EUR samples using the ancestry-unaware models, we  
507 use leave-one-out CV, as well, but only cross-validating over the AFR or EUR samples, respectively.

508

### 509 **Comparison of meta-analytic strategies**

510 We compared 5 different meta-analytic strategies empirically: meta-analyzing across ancestry-specific,  
511 per-biobank GWAS summary statistics using (1) inverse-variance weighting (IVW) and (2) sample-size  
512 weighting (SSW), meta-analyzing across ancestry-specific meta-analyzed GWAS summary statistics  
513 using (3) IVW and (4) SSW, and (5) TWAS using ancestry-unaware models into meta-analyzed GWAS  
514 summary statistics across EUR and AFR ancestry groups. First, we consider three different sets of  
515 GWAS summary statistics: biobank- and ancestry-specific summary statistics, ancestry-specific summary  
516 statistics meta-analyzed across all biobanks, and summary statistics meta-analyzed across biobanks and  
517 ancestry groups. In two former settings, for biobank  $i$  and a given gene, we generate  $\beta_{TWAS,i}$ , the TWAS  
518 effect size, and  $SE_{TWAS,i}$ , the corresponding standard error. Given  $B$  different biobanks, the IVW TWAS Z-  
519 score,  $Z_{TWAS,IVW}$ , is calculated as:

520

$$521 \quad Z_{TWAS,IVW} = \frac{\left( \frac{\sum_{i=1}^B \beta_{TWAS,i} / SE_{TWAS,i}}{\sum_{i=1}^B SE_{TWAS,i}^{-1}} \right)}{\left( \sum_{i=1}^B SE_{TWAS,i} \right)^{1/2}}.$$

522

523 With  $Z_{TWAS,i} = \beta_{TWAS,i} / SE_{TWAS,i}$  and  $N_i$  as the sample size of the  $i$ th biobank (or pooled sample size  
524 across all ancestry-specific biobank summary statistics), the SSW TWAS Z-score,  $Z_{TWAS,SSW}$ , is calculated  
525 as:

526

$$527 \quad Z_{TWAS,SSW} = \frac{\sum_{i=1}^B N_i Z_{TWAS,i}}{\left( \sum_{i=1}^B N_i^2 \right)^{1/2}}.$$

528

529 For the ancestry-unaware TWAS, we use ancestry-unaware elastic net regression models and integrate  
530 with GWAS summary statistics meta-analyzed across all ancestry groups and biobanks.

531

532 **GRex-level phenome-wide association studies (GRex-PheWAS)**

533 Transcriptome-wide significant genes are further prioritized by performing GRex-PheWAS to categorize  
534 associations across a broad spectrum of phenotypes. Using UKBB summary statistics from European  
535 ancestry patients (Bycroft et al., 2018), we tested for GTAs for 731 phenotypes grouped into 9 categories:  
536 dermatologic, digestive, endocrine/metabolic, genitourinary, hematopoietic, musculoskeletal, neoplasms,  
537 neurological, and respiratory. Here, we illustrate GRex-PheWAS using three genes from the European-  
538 specific TWAS for asthma risk using lung tissue expression: *TAF7* (MOSTWAS model), *IL18RAP* (JTI  
539 model), and *TMEM258* (JTI model). A phenome-wide significant association was defined via Bonferroni  
540 correction ( $P < \frac{0.05}{3 \times 731} = 2.28 \times 10^{-5}$ ).

541

542 **SUPPLEMENTAL INFORMATION**

543 **Table S1:** *Difference in adjusted  $R^2$  between models trained in aligned and misaligned ancestry samples*  
544 *as the ancestry of the imputation sample.*

545 **Table S2:**  *$R^2$  of ancestry-specific models imputed into EUR imputation sample (training:imputation)*

546 **Table S3:**  *$R^2$  of ancestry-specific models imputed into AFR imputation sample (training:imputation)*

547 **Table S4:** *Difference in  $R^2$  between ancestry-specific and ancestry-unaware models across MAF*

548 **Table S5:** *Cross-validation  $R^2$  of ancestry-unaware models across MAF threshold*

549 **Table S6:** *GRex-PheWAS results for 3 representative genes from asthma meta-analytic TWAS in*  
550 *Europeans in GBMI that meet Bonferroni correction ( $P < 0.05/731$ )*

551 **Figure S1:** *Ratio of predictive performance of expression models in aligned versus misaligned imputation*  
552 *samples across AFR (left) and EUR (right) ancestry in the imputation sample. Here, we down-sample the*  
553 *EUR imputation sample to match the sample size of the AFR imputation sample.*

554 **Figure S2:** *Predictive performance of expression models in aligned and misaligned imputation samples.*

555 **Figure S3:** *Predictive performance of ancestry-unaware expression models compared to ancestry-*  
556 *specific models across 5 tissues. Boxplot of difference in predictive performance in EUR (A) and AFR (B)*  
557 *samples between ancestry-aligned models and ancestry-unaware models. We consider (1) individuals of*

558 all ancestry in the training sample of the ancestry-unaware model (gold) or only EUR and AFR individuals  
559 in the training sample (grey). The red line indicates a difference of 0.

560 **Figure S4:** *Predictive performance of ancestry-unaware expression models across minor allele frequency*  
561 *thresholds.*

562 **Figure S5:** *TWAS Miami plots across AFR and EUR ancestry groups for asthma using whole blood gene*  
563 *expression models.*

564 **Figure S6:** *Correlation of TWAS Z-scores across ancestry-specific, individual biobank GWAS cohorts and*  
565 *5 meta-analytic strategies.*

566 **Figure S7:** *TWAS associations across EUR and AFR ancestry groups for DFFA across 5 tissues.* The  
567 effect size is given with the point (triangle if association is transcriptome-wide significant) with a 95%  
568 confidence interval provided.

569 **Figure S8:** *Miami plots of DFFA local-eQTLs and GWAS signal for SNPs around DFFA.* In (A), color  
570 shows linkage disequilibrium  $R^2$  to lead eQTL SNP. Grey line shows a nominal P-value cutoff of 0.05 ( $|Z|$   
571 = 1.96).

572 **Figure S9:** *Empirical Bayes estimates of bias and inflation in TWAS Z-scores across meta-analysis*  
573 *strategies.* Estimates of bias (top) and bottom (inflation) with one standard error width around the  
574 estimate are given across meta-analysis strategies. The dotted lines provide a reference for the null (0 for  
575 bias and 1 for inflation).

576 **Figure S10:** *Comparison of two IVW meta-analyzed Z-scores.* Vertical and horizontal dotted lines give a  
577 reference for the Bonferroni-corrected threshold for transcriptome-significance. A diagonal line is provided  
578 from reference.

579 **Figure S11:** *Comparison of meta-analyzed Z-scores with individual biobank TWAS Z-scores.* Ancestry-  
580 specific TWAS Z-scores for individual biobanks are shown in the top panel, colored by ancestry. Meta-  
581 analyzed Z-scores are shown in the bottom panel with shapes reflecting the different strategies. Dotted  
582 lines provide a reference for transcriptome-wide significance.

583 **Figure S12:** *UKBB T-PheWAS associations across 5 representative asthma-associated genes through*  
584 *European-only meta-analytic TWAS, grouped by phecode group.* The horizontal dotted line shows FDR-  
585 adjusted P = 0.05.

586 **Figure S13:** *Miami plots of UKBB T-PheWAS associations across 2 genes previously implicated through*  
587 *GWAS and detected in European-only meta-analytic TWAS in GBMI.*

588

## 589 REFERENCES

- 590 Abul-Husn, N.S., and Kenny, E.E. (2019). Personalized Medicine and the Power of Electronic Health  
591 Records. *Cell* 177, 58–69.
- 592 Aguet, F., Barbeira, A.N., Bonazzola, R., Brown, A., Castel, S.E., Jo, B., Kasela, S., Kim-Hellmuth, S.,  
593 Liang, Y., Oliva, M., et al. (2020). The GTEx Consortium atlas of genetic regulatory effects across human  
594 tissues. *Science* 369, 1318–1330.
- 595 Amariuta, T., Ishigaki, K., Sugishita, H., Ohta, T., Koido, M., Dey, K.K., Matsuda, K., Murakami, Y., Price,  
596 A.L., Kawakami, E., et al. (2020). Improving the trans-ancestry portability of polygenic risk scores by  
597 prioritizing variants in predicted cell-type-specific regulatory elements. *Nature Genetics* 52, 1346–1354.
- 598 Auton, A., Abecasis, G.R., Altshuler, D.M., Durbin, R.M., Bentley, D.R., Chakravarti, A., Clark, A.G.,  
599 Donnelly, P., Eichler, E.E., Flicek, P., et al. (2015). A global reference for human genetic variation. *Nature*  
600 526, 68–74.
- 601 Baca, S., Singler, C., Zacharia, S., Seo, J.-H., Morova, T., Hach, F., Ding, Y., Schwarz, T., Flora Huang,  
602 C.-C., Kalita, C., et al. (2021). Genetic determinants of chromatin reveal prostate cancer risk mediated by  
603 context-dependent gene regulation. *BioRxiv* 2021.05.10.443466.
- 604 Baharian, S., Barakatt, M., Gignoux, C.R., Shringarpure, S., Errington, J., Blot, W.J., Bustamante, C.D.,  
605 Kenny, E.E., Williams, S.M., Aldrich, M.C., et al. (2016). The Great Migration and African-American  
606 Genomic Diversity. *PLoS Genetics* 12, e1006059.
- 607 Barbeira, A.N., Dickinson, S.P., Bonazzola, R., Zheng, J., Wheeler, H.E., Torres, J.M., Torstenson, E.S.,  
608 Shah, K.P., Garcia, T., Edwards, T.L., et al. (2018). Exploring the phenotypic consequences of tissue  
609 specific gene expression variation inferred from GWAS summary statistics. *Nature Communications* 9, 1–  
610 20.
- 611 Barfield, R., Feng, H., Gusev, A., Wu, L., Zheng, W., Pasaniuc, B., and Kraft, P. (2018). Transcriptome-  
612 wide association studies accounting for colocalization using Egger regression. *Genetic Epidemiology* 42,  
613 418–433.
- 614 Bhattacharya, A., García-Closas, M., Olshan, A.F., Perou, C.M., Troester, M.A., and Love, M.I. (2020). A  
615 framework for transcriptome-wide association studies in breast cancer in diverse study populations.  
616 *Genome Biology* 21, 42.
- 617 Bhattacharya, A., Li, Y., and Love, M.I. (2021a). MOSTWAS: Multi-Omic Strategies for Transcriptome-  
618 Wide Association Studies. 17, e1009398.
- 619 Bhattacharya, A., Freedman, A.N., Avula, V., Harris, R., Liu, W., Pan, C., Lusi, A.J., Joseph, R.M.,  
620 Smeester, L., Hartwell, H.J., et al. (2021b). Genetic control of fetal placental genomics contributes to  
621 development of health and disease. *MedRxiv* 2021.04.12.21255170.
- 622 Bhattacharya, S., Lou, X., Hwang, P., Rajashankar, K.R., Wang, X., Gustafsson, J.Å., Fletterick, R.J.,  
623 Jacobson, R.H., and Webb, P. (2014). Structural and functional insight into TAF1-TAF7, a subcomplex of  
624 transcription factor II D. *Proceedings of the National Academy of Sciences of the United States of*  
625 *America* 111, 9103–9108.

- 626 Bycroft, C., Freeman, C., Petkova, D., Band, G., Elliott, L.T., Sharp, K., Motyer, A., Vukcevic, D.,  
627 Delaneau, O., O'Connell, J., et al. (2018). The UK Biobank resource with deep phenotyping and genomic  
628 data. *Nature* 562, 203–209.
- 629 Cao, C., Ding, B., Li, Q., Kwok, D., Wu, J., and Long, Q. (2021). Power analysis of transcriptome-wide  
630 association study: Implications for practical protocol choice. *PLoS Genetics* 17, e1009405.
- 631 Friedman, J., Hastie, T., and Tibshirani, R. (2010). Regularization Paths for Generalized Linear Models  
632 via Coordinate Descent. *Journal of Statistical Software* 33, 1–22.
- 633 Gallagher, M.D., and Chen-Plotkin, A.S. (2018). The Post-GWAS Era: From Association to Function.  
634 *American Journal of Human Genetics* 102, 717–730.
- 635 Gamazon, E.R., Wheeler, H.E., Shah, K.P., Mozaffari, S. v, Aquino-Michaels, K., Carroll, R.J., Eyler, A.E.,  
636 Denny, J.C., Nicolae, D.L., Cox, N.J., et al. (2015). A gene-based association method for mapping traits  
637 using reference transcriptome data. *Nature Genetics* 47, 1091–1098.
- 638 Geoffroy, E., Gregga, I., and Wheeler, H.E. (2020). Population-Matched Transcriptome Prediction  
639 Increases TWAS Discovery and Replication Rate. *IScience* 23, 101850.
- 640 Giambartolomei, C., Vukcevic, D., Schadt, E.E., Franke, L., Hingorani, A.D., Wallace, C., and Plagnol, V.  
641 (2014). Bayesian Test for Colocalisation between Pairs of Genetic Association Studies Using Summary  
642 Statistics. *PLoS Genetics* 10, e1004383.
- 643 Giambartolomei, C., Liu, J.Z., Zhang, W., Hauberg, M., Shi, H., Boocock, J., Pickrell, J., Jaffe, A.E.,  
644 Pasaniuc, B., and Roussos, P. (2018). A Bayesian framework for multiple trait colocalization from  
645 summary association statistics. *Bioinformatics* 34, 2538–2545.
- 646 Gleason, K.J., Yang, F., Pierce, B.L., He, X., and Chen, L.S. (2020). Primo: Integration of multiple GWAS  
647 and omics QTL summary statistics for elucidation of molecular mechanisms of trait-associated SNPs and  
648 detection of pleiotropy in complex traits. *Genome Biology* 21, 236.
- 649 Gusev, A., Ko, A., Shi, H., Bhatia, G., Chung, W., Penninx, B.W.J.H., Jansen, R., de Geus, E.J.C.,  
650 Boomsma, D.I., Wright, F.A., et al. (2016). Integrative approaches for large-scale transcriptome-wide  
651 association studies. *Nature Genetics* 48, 245–252.
- 652 Hauberg, M.E., Zhang, W., Giambartolomei, C., Franzén, O., Morris, D.L., Vyse, T.J., Ruusalepp, A.,  
653 Fromer, M., Sieberts, S.K., Johnson, J.S., et al. (2017). Large-Scale Identification of Common Trait and  
654 Disease Variants Affecting Gene Expression. *American Journal of Human Genetics* 100, 885–894.
- 655 He, X., Fuller, C.K., Song, Y., Meng, Q., Zhang, B., Yang, X., and Li, H. (2013). Sherlock: Detecting gene-  
656 disease associations by matching patterns of expression QTL and GWAS. *American Journal of Human*  
657 *Genetics* 92, 667–680.
- 658 Hebbring, S.J. (2014). The challenges, advantages and future of phenome-wide association studies.  
659 *Immunology* 141, 157–165.
- 660 Hedges, L., and Vevea, J. (1998). Fixed- and random-effects models in meta-analysis. *Psychological*  
661 *Methods* 3, 486–504.
- 662 Higgins, J.P.T., and Thompson, S.G. (2002). Quantifying heterogeneity in a meta-analysis. *Statistics in*  
663 *Medicine* 21, 1539–1558.
- 664 Hu, Y., Li, M., Lu, Q., Weng, H., Wang, J., Zekavat, S.M., Yu, Z., Li, B., Gu, J., Muchnik, S., et al. (2019).  
665 A statistical framework for cross-tissue transcriptome-wide association analysis. *Nature Genetics* 51,  
666 568–576.

- 667 van Iterson, M., van Zwet, E.W., Heijmans, B.T., and Heijmans, B.T. (2017). Controlling bias and inflation  
668 in epigenome- and transcriptome-wide association studies using the empirical null distribution. *Genome*  
669 *Biology* 18, 19.
- 670 Johansson, Å., Rask-Andersen, M., Karlsson, T., and Ek, W.E. (2019). Genome-wide association  
671 analysis of 350 000 Caucasians from the UK Biobank identifies novel loci for asthma, hay fever and  
672 eczema. *Human Molecular Genetics* 28, 4022–4041.
- 673 Keys, K.L., Mak, A.C.Y., White, M.J., Eckalbar, W.L., Dahl, A.W., Mefford, J., Mikhaylova, A. v.,  
674 Contreras, M.G., Elhawary, J.R., Eng, C., et al. (2020). On the cross-population generalizability of gene  
675 expression prediction models. *PLoS Genetics* 16, e1008927.
- 676 Korthauer, K., Kimes, P.K., Duvallet, C., Reyes, A., Subramanian, A., Teng, M., Shukla, C., Alm, E.J., and  
677 Hicks, S.C. (2019). A practical guide to methods controlling false discoveries in computational biology.  
678 *Genome Biology* 20, 1–21.
- 679 Lee, C.H., Eskin, E., and Han, B. (2017). Increasing the power of meta-analysis of genome-wide  
680 association studies to detect heterogeneous effects. In *Bioinformatics*, (Oxford University Press), pp.  
681 i379–i388.
- 682 Luningham, J.M., Chen, J., Tang, S., de Jager, P.L., Bennett, D.A., Buchman, A.S., and Yang, J. (2020).  
683 Bayesian Genome-wide TWAS Method to Leverage both cis- and trans-eQTL Information through  
684 Summary Statistics. *American Journal of Human Genetics* 107, 714–726.
- 685 Mancuso, N., Freund, M.K., Johnson, R., Shi, H., Kichaev, G., Gusev, A., and Pasaniuc, B. (2019).  
686 Probabilistic fine-mapping of transcriptome-wide association studies. *Nature Genetics* 51, 675–682.
- 687 Márquez-Luna, C., Gazal, S., Loh, P.R., Kim, S.S., Furlotte, N., Auton, A., and Price, A.L. (2020). LDpred-  
688 funct: incorporating functional priors improves polygenic prediction accuracy in UK Biobank and 23andMe  
689 data sets. *BioRxiv*.
- 690 Mbatchou, J., Barnard, L., Backman, J., Marcketta, A., Kosmicki, J.A., Ziyatdinov, A., Benner, C.,  
691 O’Dushlaine, C., Barber, M., Boutkov, B., et al. (2020). Computationally efficient whole genome  
692 regression for quantitative and binary traits. *BioRxiv* 2020.06.19.162354.
- 693 McGuirl, M.R., Smith, S.P., Sandstede, B., and Ramachandran, S. (2020). Detecting shared genetic  
694 architecture among multiple phenotypes by hierarchical clustering of gene-level association statistics.  
695 *Genetics* 215, 511–529.
- 696 Nagpal, S., Meng, X., Epstein, M.P., Tsoi, L.C., Patrick, M., Gibson, G., de Jager, P.L., Bennett, D.A.,  
697 Wingo, A.P., Wingo, T.S., et al. (2019). TIGAR: An Improved Bayesian Tool for Transcriptomic Data  
698 Imputation Enhances Gene Mapping of Complex Traits. *American Journal of Human Genetics* 105, 258–  
699 266.
- 700 Pasaniuc, B., Zaitlen, N., Shi, H., Bhatia, G., Gusev, A., Pickrell, J., Hirschhorn, J., Strachan, D.P.,  
701 Patterson, N., Price, A.L., et al. (2014). Fast and accurate imputation of summary statistics enhances  
702 evidence of functional enrichment. *Bioinformatics* 30, 2906–2914.
- 703 Pathak, G.A., Singh, K., Miller-Fleming, T.W., Wendt, F., Ehsan, N., Hou, K., Johnson, R., Lu, Z.,  
704 Gopalan, S., Dimbou, L.Y., et al. (2020). Integrative analyses identify susceptibility genes underlying  
705 COVID-19 hospitalization. *MedRxiv*.
- 706 Pavlides, J.M.W., Zhu, Z., Gratten, J., McRae, A.F., Wray, N.R., and Yang, J. (2016). Predicting gene  
707 targets from integrative analyses of summary data from GWAS and eQTL studies for 28 human complex  
708 traits. *Genome Medicine* 8, 84.



- 709 Portelli, M.A., Nicole Dijk, F., Ketelaar, M.E., Shrine, N., Hankinson, J., Bhaker, S., Grotenboer, N.S.,  
710 Obeidat, M., Henry, A.P., Billington, C.K., et al. (2020). Phenotypic and functional translation of IL1RL1  
711 locus polymorphisms in lung tissue and asthmatic airway epithelium. *JCI Insight* 5.
- 712 Reijmerink, N.E., Postma, D.S., Bruinenberg, M., Nolte, I.M., Meyers, D.A., Bleecker, E.R., and  
713 Koppelman, G.H. (2008). Association of IL1RL1, IL18R1, and IL18RAP gene cluster polymorphisms with  
714 asthma and atopy. *Journal of Allergy and Clinical Immunology* 122, 651-654.e8.
- 715 Reijmerink, N.E., Postma, D.S., and Koppelman, G.H. (2010). The candidate gene approach in asthma:  
716 what happens with the neighbours? *European Journal of Human Genetics* 17.
- 717 Shang, L., Smith, J.A., Zhao, W., Kho, M., Turner, S.T., Mosley, T.H., Kardina, S.L.R., and Zhou, X.  
718 (2020). Genetic Architecture of Gene Expression in European and African Americans: An eQTL Mapping  
719 Study in GENOA. *American Journal of Human Genetics* 106, 496–512.
- 720 Shi, J., and Lee, S. (2016). A novel random effect model for GWAS meta-analysis and its application to  
721 trans-ethnic meta-analysis. *Biometrics* 72, 945–954.
- 722 Shifman, S., Kuypers, J., Kokoris, M., Yakir, B., and Darvasi, A. (2003). Linkage disequilibrium patterns of  
723 the human genome across populations. *Human Molecular Genetics* 12, 771–776.
- 724 Smith, G.D., and Ebrahim, S. (2003). ‘Mendelian randomization’: can genetic epidemiology contribute to  
725 understanding environmental determinants of disease? *International Journal of Epidemiology* 32, 1–22.
- 726 Stevens, J.R., Masud, A. al, and Suyundikov, A. (2017). A comparison of multiple testing adjustment  
727 methods with block-correlation positivelydependent tests. *PLoS ONE* 12.
- 728 Swede, H., Stone, C.L., and Norwood, A.R. (2007). National population-based biobanks for genetic  
729 research. *Genetics in Medicine* 9, 141–149.
- 730 Unlu, G., Gamazon, E.R., Qi, X., Levic, D.S., Bastarache, L., Denny, J.C., Roden, D.M., Mayzus, I.,  
731 Breyer, M., Zhong, X., et al. (2019). GRIK5 Genetically Regulated Expression Associated with Eye and  
732 Vascular Phenomes: Discovery through Iteration among Biobanks, Electronic Health Records, and  
733 Zebrafish. *The American Journal of Human Genetics* 104, 503–519.
- 734 Unlu, G., Qi, X., Gamazon, E.R., Melville, D.B., Patel, N., Rushing, A.R., Hashem, M., Al-Faifi, A., Chen,  
735 R., Li, B., et al. (2020). Phenome-based approach identifies RIC1 -linked Mendelian syndrome through  
736 zebrafish models, biobank associations and clinical studies. *Nature Medicine* 2020 26:1 26, 98–109.
- 737 Veturi, Y., and Ritchie, M.D. (2018). How powerful are summary-based methods for identifying  
738 expression-trait associations under different genetic architectures? In *Pacific Symposium on*  
739 *Biocomputing*, (World Scientific Publishing Co. Pte Ltd), pp. 228–239.
- 740 Vicente, C.T., Revez, J.A., and Ferreira, M.A.R. (2017). Lessons from ten years of genome-wide  
741 association studies of asthma. *Clinical and Translational Immunology* 6, e165.
- 742 Wainberg, M., Sinnott-Armstrong, N., Mancuso, N., Barbeira, A.N., Knowles, D.A., Golan, D., Ermel, R.,  
743 Ruusalepp, A., Quertermous, T., Hao, K., et al. (2019). Opportunities and challenges for transcriptome-  
744 wide association studies. *Nature Genetics* 51, 592–599.
- 745 Wei, W.Q., Bastarache, L.A., Carroll, R.J., Marlo, J.E., Osterman, T.J., Gamazon, E.R., Cox, N.J., Roden,  
746 D.M., and Denny, J.C. (2017). Evaluating phecodes, clinical classification software, and ICD-9-CM codes  
747 for phenome-wide association studies in the electronic health record. *PLoS ONE* 12.
- 748 Wijmenga, C., and Zhernakova, A. (2018). The importance of cohort studies in the post-GWAS era.  
749 *Nature Genetics* 50, 322–328.

- 750 Wyss, A.B., Sofer, T., Lee, M.K., Terzikhan, N., Nguyen, J.N., Lahousse, L., Latourelle, J.C., Smith, A.V.,  
751 Bartz, T.M., Feitosa, M.F., et al. (2018). Multiethnic meta-analysis identifies ancestry-specific and cross-  
752 ancestry loci for pulmonary function. *Nature Communications* 9, 1–15.
- 753 Yang, F., Wang, J., Pierce, B.L., and Chen, L.S. (2017). Identifying cis-mediators for trans-eQTLs across  
754 many human tissues using genomic mediation analysis. *Genome Research* 27, 1859–1871.
- 755 Yang, J., Lee, S.H., Goddard, M.E., and Visscher, P.M. (2011). GCTA: a tool for genome-wide complex  
756 trait analysis. *American Journal of Human Genetics* 88, 76–82.
- 757 Yuan, Z., Zhu, H., Zeng, P., Yang, S., Sun, S., Yang, C., Liu, J., and Zhou, X. (2020). Testing and  
758 controlling for horizontal pleiotropy with probabilistic Mendelian randomization in transcriptome-wide  
759 association studies. *Nature Communications* 11, 1–14.
- 760 Zhang, Y., Quick, C., Yu, K., Barbeira, A., Luca, F., Pique-Regi, R., Kyung Im, H., and Wen, X. (2020).  
761 PTWAS: Investigating tissue-relevant causal molecular mechanisms of complex traits using probabilistic  
762 TWAS analysis. *Genome Biology* 21, 1–26.
- 763 Zhong, Y., Perera, M.A., and Gamazon, E.R. (2019). On Using Local Ancestry to Characterize the  
764 Genetic Architecture of Human Traits: Genetic Regulation of Gene Expression in Multiethnic or Admixed  
765 Populations. *American Journal of Human Genetics* 104, 1097–1115.
- 766 Zhou, D., Jiang, Y., Zhong, X., Cox, N.J., Liu, C., and Gamazon, E.R. (2020). A unified framework for  
767 joint-tissue transcriptome-wide association and Mendelian randomization analysis. *Nature Genetics* 52,  
768 1239–1246.
- 769 Zhou, W., Nielsen, J.B., Fritsche, L.G., Dey, R., Gabrielsen, M.E., Wolford, B.N., LeFaive, J., VandeHaar,  
770 P., Gagliano, S.A., Gifford, A., et al. (2018). Efficiently controlling for case-control imbalance and sample  
771 relatedness in large-scale genetic association studies. *Nature Genetics* 50, 1335–1341.
- 772 Zhou, W., Kanai, M., Wu, K.-H.H., Humaira, R., Tsuo, K., Hirbo, J.B., Wang, Y., Bhattacharya, A., Zhao,  
773 H., Namba, S., et al. (2021). Global Biobank Meta-analysis Initiative: powering genetic discovery across  
774 human diseases. *MedRxiv* 27, 2021.11.19.21266436.
- 775 Zhu, A., Matoba, N., Wilson, E.P., Tapia, A.L., Li, Y., Ibrahim, J.G., Stein, J.L., and Love, M.I. (2021).  
776 MRLocus: Identifying causal genes mediating a trait through Bayesian estimation of allelic heterogeneity.  
777 *PLOS Genetics* 17, e1009455.
- 778 Zhu, Z., Guo, Y., Shi, H., Liu, C.L., Panganiban, R.A., Chung, W., O'Connor, L.J., Himes, B.E., Gazal, S.,  
779 Hasegawa, K., et al. (2020). Shared genetic and experimental links between obesity-related traits and  
780 asthma subtypes in UK Biobank. *Journal of Allergy and Clinical Immunology* 145, 537–549.

## A. TRANSCRIPTOME-WIDE ASSOCIATION STUDY

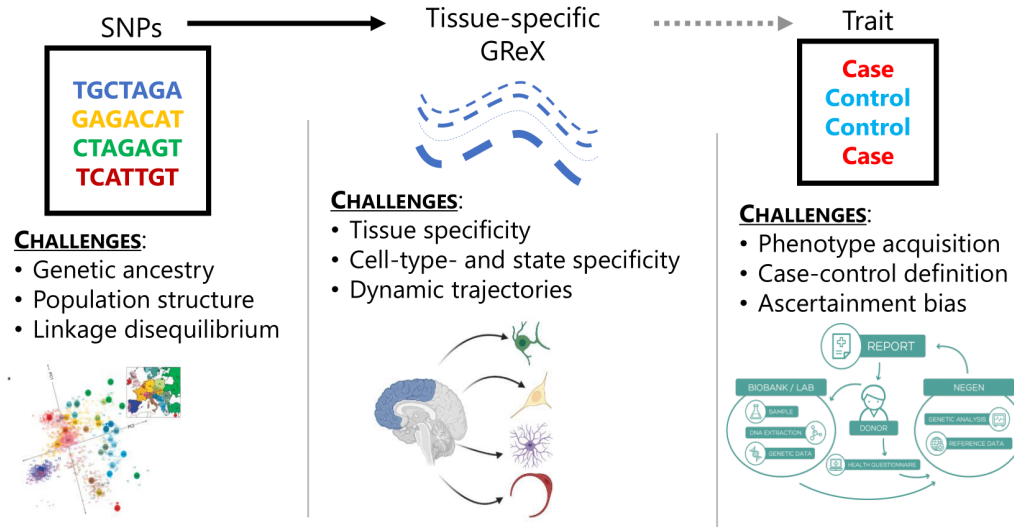

## B. GBMI TWAS PIPELINE

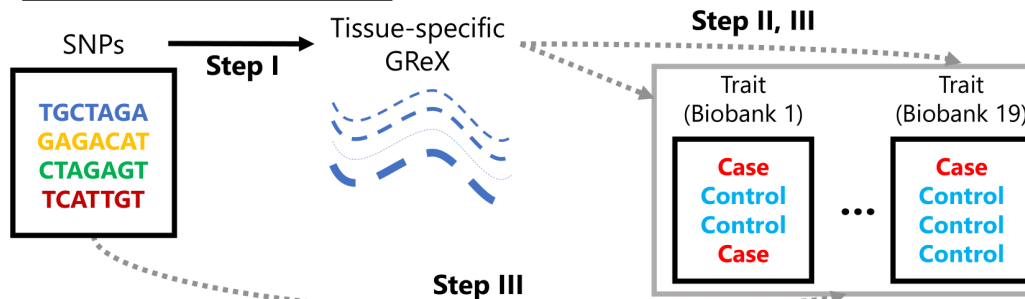

### I. Train expression models from germline genetics

- Cis-SNP, multi-tissue method: **JTI** (Zhou et al 2020, Nat Gen)
- Distal-SNP-enriched method: **MOSTWAS** (Bhattacharya et al 2021, PLOS Genet)
- Align genetic ancestry of eQTL and GWAS panels

### II. Test for gene-trait associations

- Meta-analyze across biobanks and ancestry groups using properly aligned LD references with inverse-variance weights

### III. Conduct follow-up tests for prioritized genes

- Conditional/permutation tests
- **FOCUS** to estimate credible set of causal genes at a locus (Mancuso et al 2019, Nat Gen)
- Distal SNP test for potential mediators in **MOSTWAS**
- Estimate the degree of SNP horizontal pleiotropy

**Figure 1: Overview of GBMI transcriptome-wide association study (TWAS) pipeline with challenges at every data level. (A)** Each level of data in TWAS introduces a unique set of challenges: (1) genetics data include confounding from genetic ancestry, population structure and relatedness, and complex linkage disequilibrium patterns, (2) gene expression data introduces context-specific factors, such as tissue-, cell-type-, or cell-state-specific expression, and (3) phenotypic data, especially in the meta-analyses of multiple biobanks, involve challenges in acquiring and aggregating phenotypes, properly defining controls for phenotypes, and ascertainment and selection bias from non-random sampling. **(B)** An overview of the GBMI TWAS pipeline: (1) JTI and MOSTWAS for model training, (2) inverse-variance weighted meta-analysis using per-biobank, per-ancestry group TWAS summary statistics, and (3) various follow-up tests, including conditional or permutation tests, distal-SNPs added last test, probabilistic fine-mapping using FOCUS, and tests for SNP horizontal pleiotropy. Dotted lines represent associations that are tested in the TWAS pipeline, while the solid lines represent a link built through predictive modeling.

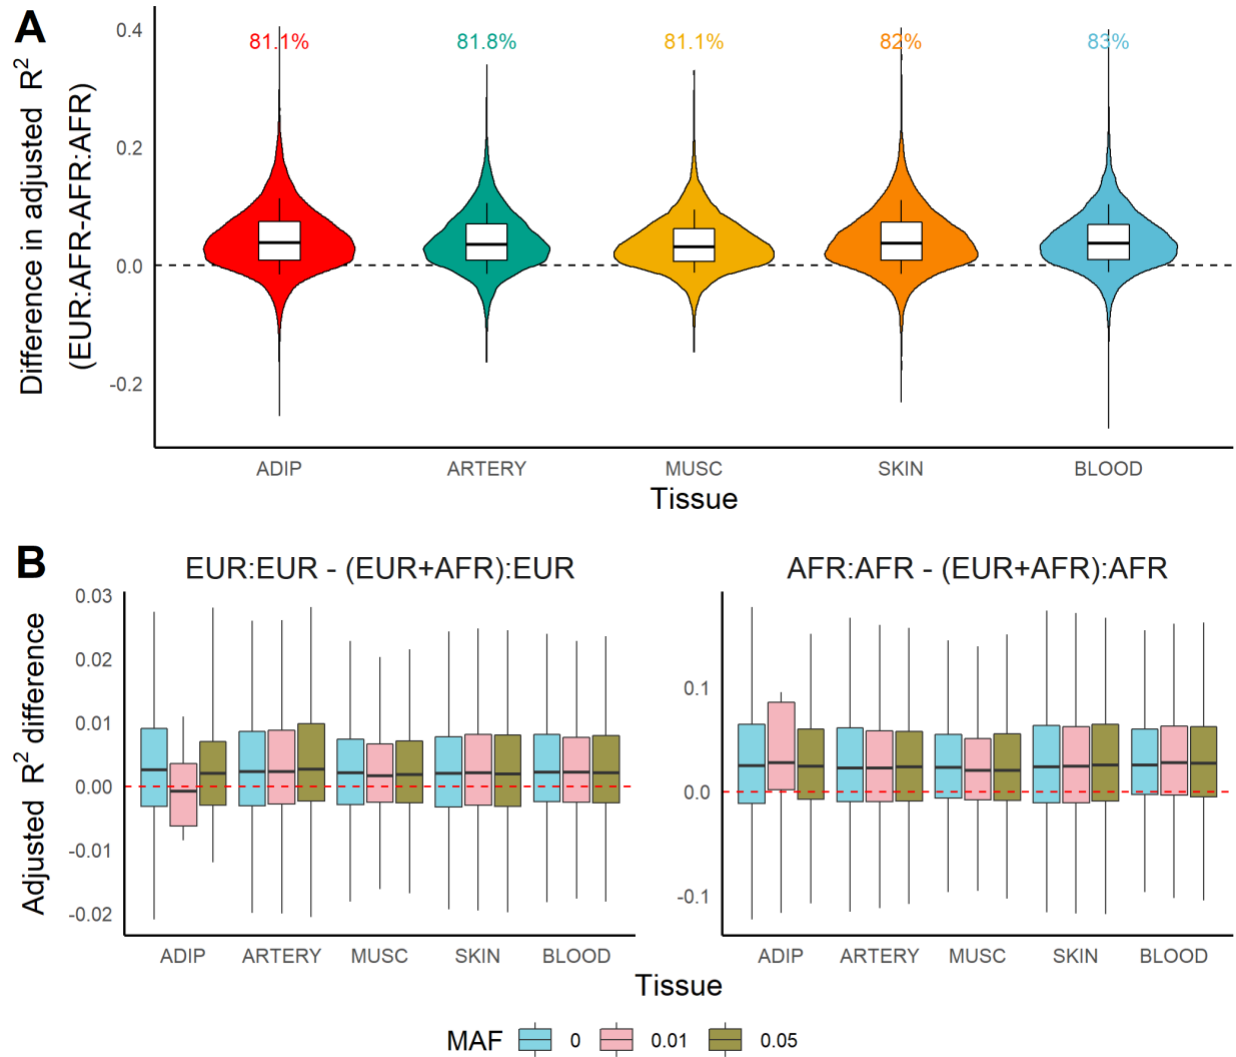

**Figure 2:** Comparison of predictive performance of genetic models of expression across ancestry. **(A)** Distribution of difference in adjusted  $R^2$  (Y-axis) when predicting expression in the AFR imputation sample between models trained in EUR and in AFR training samples across tissue (X-axis). **(B)** Distribution of difference in adjusted  $R^2$  between ancestry-specific and ancestry-unaware models imputing into EUR (left) and AFR (right) samples.

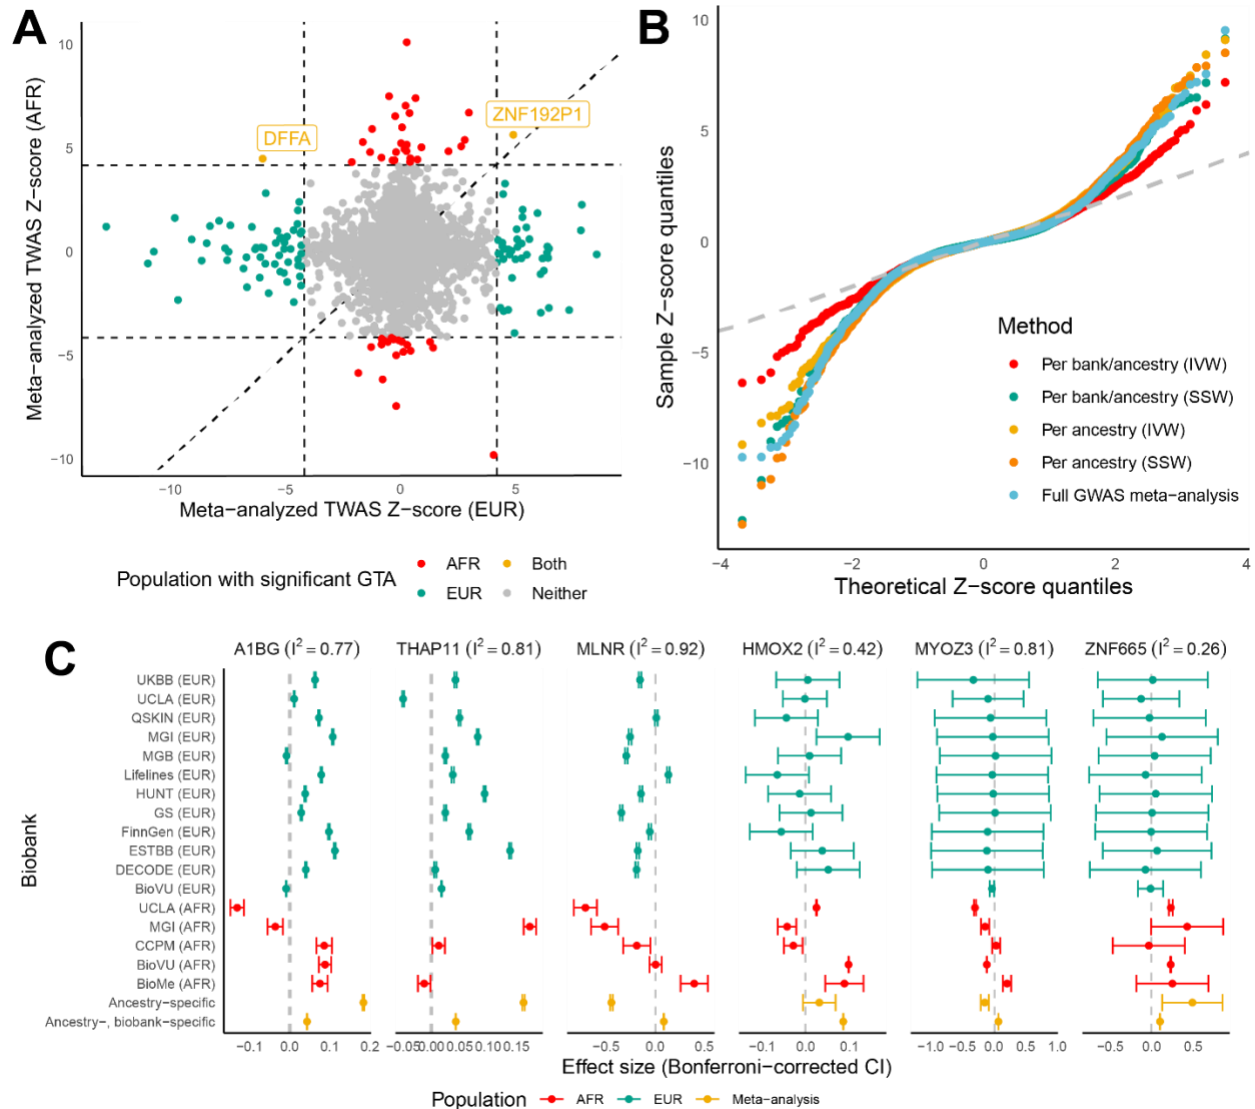

**Figure 3: Comparison of meta-analytic strategies for multi-biobank, trans-ancestry TWAS. (A)** Scatterplot of per-ancestry meta-analyzed TWAS scores across EUR (X-axis) and AFR ancestry (Y-axis). The dotted horizontal and vertical lines indicate  $P < 2.5 \times 10^{-6}$  with a diagonal line for reference. Points are colored based on which ancestry population the TWAS association meets  $P < 2.5 \times 10^{-6}$ . **(B)** QQ-plot of TWAS Z-scores, colored by meta-analytic strategies. Per ancestry refers to TWAS meta-analysis across meta-analyzed ancestry-specific GWAS summary statistics. Per bank/per ancestry refers to TWAS meta-analysis using all biobank- and ancestry-specific GWAS summary statistics. **(C)** Effect sizes and Bonferroni-corrected confidence intervals (CIs) for TWAS associations across 17 individual biobanks (stratified by ancestry group with EUR in green and AFR in red) and 2 IVW meta-analysis strategies (in yellow) for 5 representative genes. The Higgins-Thompson  $I^2$  statistic for heterogeneity is provided, with the dotted line showing the null.

It is made available under a [CC-BY 4.0 International license](https://creativecommons.org/licenses/by/4.0/).

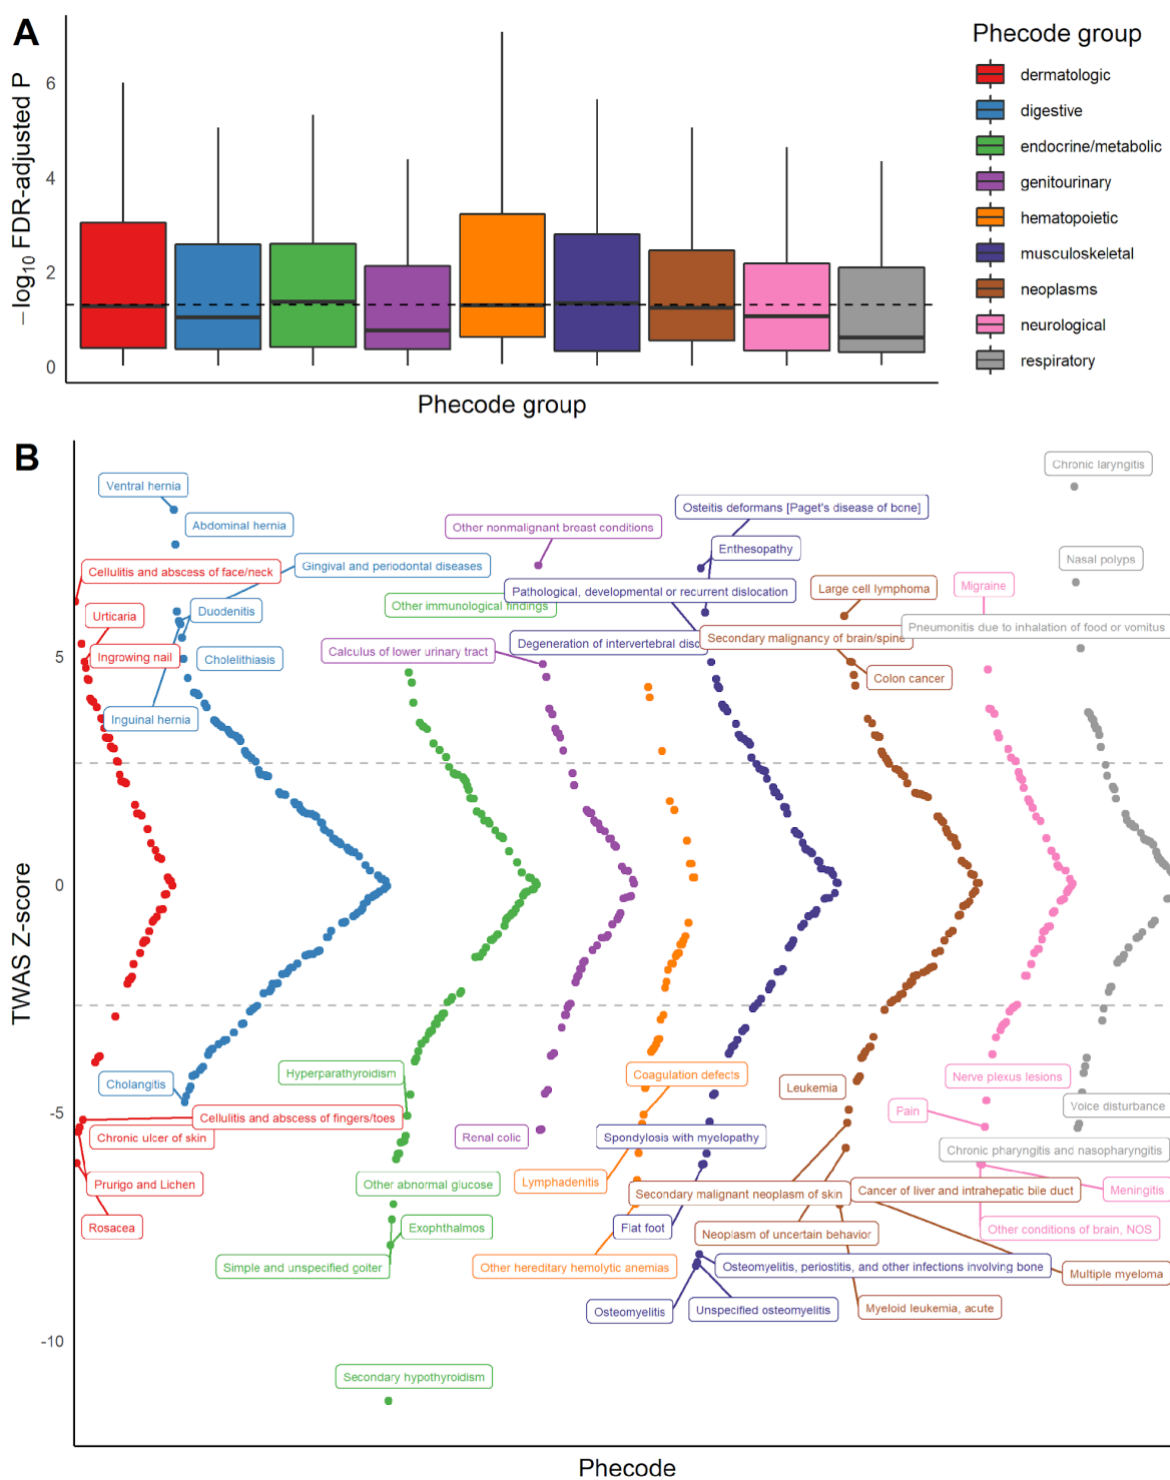

**Figure 4: GReX-PheWAS for categorizing phenome-wide associations for TAF7 genetically-regulated expression in UKBB. (A)** Boxplots of  $-\log_{10}$  Benjamini-Hochberg FDR-adjusted P-values of GTAs across 9 phenotype groups. The dotted grey line showed FDR-adjusted P = 0.05. **(B)** Miami plot of TWAS Z-scores (Y-axis) across phenotypes, colored by phecode group. The dotted grey line shows the significance threshold for Benjamini-Hochberg FDR correction and phenotypes are labelled if the association passes Bonferroni correction.
